# Supplementary material for: 3D printed HAMA/GelMA/lignosulfonate hydrogel integrating oxygen-releasing and antioxidative modules for liver regeneration
Source: Research Square preprint supplement (doi:10.21203/rs.3.rs-8380365/v1), 2025-12-26
Supplement: Supplementary file 1 [file acab773e0e698a8fce269ae9.docx]

**Supporting information**

**3D-printed HAMA/GelMA/lignosulfonate hydrogel integrating oxygen-releasing and antioxidative modules for liver regeneration**

**1 Materials and methods**

**1.1 Materials and reagents**

Anhydrous calcium chloride, zinc acetate, sodium lignosulfonate, methacrylic anhydride (MA), polyethylene glycol 200 (PEG 200), and 2-methylimidazole were purchased from Shanghai Macklin Biochemical Co., Ltd. (Shanghai, China). Lithium Phenyl-2,4,6-trimethylbenzoylphosphinate (LAP) was purchased from Shanghai Yinchang New Materials Co., Ltd. Gelatin was obtained from Sigma-Aldrich Trading Co., Ltd. (Shanghai, China), and hyaluronic acid was purchased from YuanYe Bio-Technology Co., Ltd. (Shanghai, China). FH1 was purchased from Selleck Biotechnology Co., LTD. Droplet generation oil and demulsifier were purchased from Zhongxin Qiheng Scientific Instrument Co., Ltd. (Suzhou, China). The live/dead cell staining kit and rhodamine B-labeled phalloidin were supplied by KeyGEN Biotech, Jiangsu, China. DMEM culture medium, penicillin-streptomycin, 0.25% trypsin, and fetal bovine serum were acquired from Gibco, Shanghai, China. All other reagents were used as received without further purification.

**1.2 Preparation of CaO2 Nanoparticles**

Calcium peroxide (CaO2) nanoparticles were synthesized via a precipitation method. Briefly, 3 g of calcium chloride was dissolved in 30 mL of distilled water. Subsequently, 15 mL of ammonia solution (30 wt%) was added to the solution in a 100 mL beaker and stirred until homogeneous. Then, 120 mL of polyethylene glycol 200 (PEG200) was added to the mixture, followed by ultrasonication for 15 minutes and vigorous stirring for an additional 30 minutes. Afterward, 15 mL of hydrogen peroxide was added dropwise at a rate of one drop every 10 seconds using a microsyringe pump. The reaction was allowed to proceed for 2 hours. Following this, 1 M sodium hydroxide was slowly added to the suspension until the pH reached 11.5. The mixture was left to stand, and the supernatant was carefully decanted. The precipitate was washed three times with 0.1 M sodium hydroxide solution, each time allowing the mixture to settle and discarding the supernatant. The final precipitate was collected by centrifugation at 2000 rpm, followed by freeze-drying to obtain yellow solid nanoparticles. The product was stored under vacuum at room temperature.

**1.3 Synthesis of ZIF-8**

ZIF-8 nanoparticles were synthesized by dissolving 8.87 g of 2-methylimidazole in 50 mL of deionized water, followed by the addition of 500 mg of zinc acetate hexahydrate. The solution was stirred at room temperature for 24 hours. The resulting precipitate was collected by centrifugation at 6000 rpm for 10 minutes, washed three times with deionized water, and then freeze-dried for 48 hours to obtain ZIF-8 nanoparticles.

**1.4 Synthesis of CaO2@ZIF-8@SL**

To prepare CaO2@ZIF-8@SL, 32.3 mg of CaO2and 3.2 g of 2-methylimidazole were dissolved in 13 mL of water and mixed with a solution containing 81 mg of zinc acetate [Zn(CH3COO)2] and 10 mg of SL dissolved in 400 mL of water. The mixture was incubated overnight at room temperature. The resulting solid was collected by centrifugation, washed thoroughly with deionized water, and dried at room temperature to obtain the yellow solid product CaO2@ZIF-8@SL.

**1.5 Preparation of FH1-Loaded Sodium Alginate Microspheres (FH1@SA)**

Ca-EDTA solution was prepared by mixing 1.2 mL of 2 M CaCl2 with 4.8 mL of 0.5 M EDTA, adjusting the pH to ~7.2 using 2 M NaOH, and diluting to 10 mL with ultrapure water. Sodium alginate (10 mg) was dissolved in 0.5 mL of deionized water at 60 °C. FH1 (1 mg) was dissolved in 25 μL of DMSO and mixed with the alginate solution to obtain FH1@SA. Equal volumes of FH1@SA and Ca-EDTA solutions were combined to yield the FH1@SA/Ca-EDTA precursor. The aqueous phase (FH1@SA/Ca-EDTA) and 2% droplet-generation oil were loaded into 2.5 mL syringes and injected into a microfluidic chip at 0.1 mL/h and 1.0 mL/h, respectively. The resulting droplets were collected in 1% acetic acid oil and cured for 30-60 min to form hydrogel microspheres. After removing the oil phase, a demulsifier (2× microsphere volume) was added. Following centrifugation at 1000 rpm for 30 s, the demulsifier was discarded, and the microspheres were washed 2-3 times with PBS and collected.

**1.6 Preparation of Methacrylated Gelatin (GelMA)**

Gelatin (5.0 g) was dissolved in 50 mL of PBS at 50 °C under magnetic stirring until fully transparent. Then, 3 mL of methacrylic anhydride was added dropwise, and the mixture was stirred at 700 rpm for 1 h at 50 °C. The resulting solution contained visible oily droplets. After the reaction, the mixture was transferred to a dialysis bag (MWCO 3500 Da) and dialyzed against deionized water at 40 °C for 3 days to remove unreacted byproducts. The dialyzed solution was centrifuged at 5000 rpm for 10 min to remove any precipitate. The supernatant was collected and freeze-dried at -80 °C to obtain the final GelMA product.

**1.7 Preparation of Methacrylated Hyaluronic Acid (HAMA)**

Hyaluronic acid (5.0 g) was dissolved in 400 mL of deionized water under mechanical stirring until fully dissolved. Then, 12 mL of methacrylic anhydride was added, and the pH was adjusted to 8.5 using 5 M NaOH. The reaction was stirred at room temperature for 24 h. The mixture was then dialyzed using a cellulose dialysis membrane (MWCO ~2 kDa) and subsequently freeze-dried to obtain HAMA.

**1.8 3D Printing of GelMA/HAMA/HUCMSC Scaffolds Loaded with FH1@SA Microspheres and CaO2@ZIF-8@SL Nanoparticles (GHH, GHHF, GHHC, GHHFC)**

GelMA and HAMA were dissolved in deionized water containing a photoinitiator (LAP) and light absorber (tartrazine) to prepare the bioink. First, a photoinitiator solution was prepared by dissolving 1 mg of LAP and 0.6 mg of tartrazine in 1 mL of deionized water, followed by vortexing for 30 s. Then, 0.01 g of HAMA was dissolved in 1 mL of deionized water to obtain a 1% HAMA solution. GelMA (0, 0.025, 0.050, or 0.075 g) was dissolved in the HAMA solution to form the GelMA/HAMA mixture. Subsequently, 5 mg of CaO2@ZIF-8@SL and 2 mg of FH1@SA were added to the mixture to complete the composite bioink. The ink was loaded into a 3D bioprinter, and printing was performed using the following parameters: light intensity 18 mW/cm2, exposure time 24 s, one base layer, and base layer exposure time 26 s. After printing, the hydrogel scaffolds were washed 2-3 times with sterile PBS to remove residual reagents.

**1.9 Characterization of CaO2 Nanoparticles**

**1.9.1. Fourier Transform Infrared Spectroscopy (FTIR)**

8 mg of sample was thoroughly mixed with dried potassium bromide (KBr) powder at a mass ratio of ~5% using an agate mortar. The mixture was pressed into a pellet under vacuum (20 mmHg) for 5 min. FTIR spectra were recorded over the range of 4000-400 cm-1.

**1.9.2 X-ray Diffraction (XRD)**

The dried ZIF-8, CaO2 and CaO2@ZIF-8@SL powder was ground and loaded onto a sample holder. XRD analysis was performed using a diffractometer equipped with a Cu Kα radiation source (λ = 1.5406 Å), operating at 40 kV and 40 mA, with a 2θ range from 10° to 80°.

**1.9.3 Dynamic Light Scattering (DLS)**

Nanoparticles were dispersed in deionized water and sonicated for uniform dispersion. Particle size and zeta potential were measured using a laser particle size analyzer.

**1.9.4 Transmission Electron Microscopy (TEM)**

The diluted and ultrasonicated nanoparticle solution was dropped (20 μL) onto a copper grid and negatively stained with 1% phosphotungstic acid. After air-drying, samples were observed under a TEM to analyze internal morphology.

**1.9.5 Dissolved Oxygen Measurement**

A 3% H2O2 solution was prepared by adding 1 mL of 30% H2O2 to 9 mL of pure water. A portable dissolved oxygen meter was calibrated using 5% sodium sulfite. Dissolved oxygen levels were measured in three groups: (i) H2O, (ii) H2O + H2O2, and (iii) H2O + H2O2 + CaO2@ZIF-8@SL (2 mg added to 100 mL water + 1 mL 3% H2O2).

**1.9.6 ROS Scavenging Activity**

The antioxidant activity of CaO2@ZIF-8@SL was assessed using the DPPH assay. Samples were incubated with DPPH solution in the dark for 30 min, and the absorbance of the residual DPPH was measured via UV-Vis spectroscopy. The DPPH scavenging efficiency was calculated as:

D (%) = [(Ablank − (Asample- Acontrol)) / Ablank] × 100%

**1.10 Characterization of Microspheres**

**1.10.1 Morphology and Size Distribution**

Microspheres were fabricated using a 1% FH1@SA/Ca-EDTA solution as the dispersed phase. Flow rate ratios of dispersed phase to continuous phase were set at 1:2.5, 1:5, and 1:10 using a microfluidic system. The morphology of the resulting microspheres was observed under an optical microscope, and their size distribution was analyzed using ImageJ software.

**1.10.2 Scanning Electron Microscopy (SEM)**

Lyophilized microspheres were mounted on conductive adhesive tape and sputter-coated with gold for 60 seconds. The surface morphology was examined using SEM under an accelerating voltage of 5 kV.

**1.11 Characterization of Hydrogel Scaffolds**

**1.11.1 FTIR Analysis**

FTIR spectra were recorded for GelMA, HAMA, and lyophilized printed hydrogels, as well as for ZIF-8, CaO2, and CaO2@ZIF-8@SL. Approximately 8 mg of sample was intimately mixed with dry KBr (≈5 wt%) in an agate mortar, pressed into pellets under vacuum, and scanned from 4000–400 cm-1 (typical settings: 4 cm-1 resolution, 32 scans) with background subtraction against a blank KBr pellet.

**1.11.2 NMR Spectroscopy**

1H NMR spectra were acquired for GelMA and HAMA to assess polymer structure. Each sample (~8 mg) was dissolved in D2O with brief sonication, transferred to an NMR tube, and measured at room temperature (typical: 600 MHz, 32 scans). Spectra were processed in MestReNova.

**1.11.3 Macroscopic Appearance and Compression-Fracture Imaging**

Hydrogel scaffolds (10 mm height) were photographed under white light to document pore geometry. Compression was applied while observing the onset of fracture.

**1.11.4 SEM**

Lyophilized hydrogels (surface and cryo-fractured cross-sections) were mounted on conductive tape, sputter-coated with gold for 60 s, and imaged by SEM at 5 kV to reveal microstructural details.

**1.11.5 Compressive Modulus**

Cylindrical hydrogel samples (500 µL, Ø = 11 mm) were placed between platens of a universal testing machine. Compression was performed at 0.05 mm/s to 70 % strain, recording force (F) and displacement.

The modulus (E) was calculated by E = F/S

where S is cross-sectional area.

**1.11.6 Rheological Testing**

Rheology was measured on a 25 mm parallel-plate geometry at 25 °C. Dynamic frequency sweeps (0.1-100 rad/s) were performed within the linear viscoelastic region to record storage (G′) and loss (G″) moduli.

**1.11.7 *In Vitro* Swelling**

Hydrogel precursors (500 µL) were photo-crosslinked in 48-well plates, removed, blotted, and weighed (Wo). Samples were incubated in PBS at 37 °C. At 1, 2, 4, 6, 8, 12 and 24 h, scaffolds were blotted and weighed (Wt).

Swelling ratio (%) = [(Wt–Wo)/Wo]×100%

**1.11.8 *In Vitro* Degradation**

Crosslinked hydrogels (500 µL) were lyophilized and weighed (Wo). Samples were immersed in PBS or 5 U/mL collagenase II at 37 °C on a shaker; media were refreshed every 3 days. At 3, 7, 10, 14, 21 and 28 days, samples were rinsed, lyophilized and weighed (Wt).

Degradation (%) = [(Wo–Wt)/Wo]×100%

**1.11.9 *In Vitro* FH1 Release**

100 mg FH1@SA was mixed with 1 mL of 7.5 % GelMA/1 % HAMA precursor, photo-crosslinked, and placed in 2 mL PBS (0.1 % Tween 80). At 1, 3, 7, 10, 14, 21 and 28 days, 2 mL of release medium was sampled and replaced with fresh buffer. FH1 concentration was determined by UV-Vis based on a standard curve. Cumulative release (Er) was calculated as:

100%

where Vₑ = sample volume (2 mL), Cᵢ = concentration at the ith time point, V₀ = total medium volume, and m₍drug₎ = total drug mass.

**1.12 *In vitro* cytotoxicity**

**1.12.1 Cytotoxicity of CaO2@ZIF-8@SL (CCK-8 assay)**

A CaO2@ZIF-8@SL solution was prepared at a concentration of 10 mg/mL using sterile phosphate-buffered saline (PBS). After complete dissolution, the solution was filtered through a 0.22 μm sterile syringe filter. The filtrate was then diluted with DMEM complete medium to final concentrations of 2.5, 1, 0.5, 0.25, 0.1, 0.05, 0.025, and 0.01 mg/mL for subsequent use. Human umbilical cord mesenchymal stem cells (HUCMSCs) and HepaRG hepatocytes were digested with 0.05% trypsin and resuspended in DMEM. Cells were seeded into 96-well plates at a density of 5000 cells per well and incubated at 37 °C in a humidified incubator with 5% CO2 for 24 h to allow adherence. Afterward, the culture medium was removed, and cells were washed with PBS. Then, CaO2@ZIF-8@SL solutions at varying concentrations were added and incubated for another 24 h. Following treatment, the medium was removed and cells were washed three times with PBS. Subsequently, 100 μL of CCK-8 working solution (prepared by diluting CCK-8 with DMEM basal medium at a ratio of 1:10) was added to each well. Cells were incubated at 37°C in a 5% CO2 atmosphere for 30 min, and the absorbance at 450 nm was measured using a microplate reader. Cell viability was calculated according to the following formula:

Cell viability (%) = ×100%

**1.12.2 Cytotoxicity of FH1@SA Hydrogel Microspheres (CCK-8 assay)**

A solution of FH1@SA hydrogel microspheres was prepared at a concentration of 10 mg/mL using sterile phosphate-buffered saline (PBS). After complete dissolution, the solution was filtered through a 0.22 μm sterile syringe filter. The filtrate was then diluted with DMEM complete medium to final concentrations of 2.5, 1, 0.5, 0.25, 0.1, 0.05, 0.025, and 0.01 mg/mL for subsequent experiments. Human umbilical cord mesenchymal stem cells (HUCMSCs) and HepaRG hepatocytes were digested with 0.05% trypsin and resuspended in DMEM. The cells were seeded into 96-well plates at a density of 5000 cells per well and incubated at 37 °C in a humidified incubator containing 5% CO2 for 24 h to allow cell attachment. After removing the medium and washing with PBS, FH1@SA solutions of different concentrations were added and cells were incubated for another 24 h. Following incubation, the medium was discarded and the cells were washed three times with PBS. Then, 100 μL of CCK-8 working solution (prepared by diluting CCK-8 with DMEM basal medium at a ratio of 1:10) was added to each well. After incubation at 37 °C in a 5% CO2 incubator for 30 min, the absorbance was measured at 450 nm using a microplate reader. Cell viability was calculated using the following formula:

Cell viability (%) = ×100%

**1.12.3 Cytotoxicity of 3D-Printed HUCMSC-Loaded Hydrogel**

Lyophilized GelMA, HAMA CaO2@ZIF-8@SL and FH1@SA were sterilized under ultraviolet (UV) light for 24 h. Sterile PBS was then used to prepare the corresponding hydrogels (GHH, GHHF, GHHC, and GHHFC). To obtain hydrogel extracts, the hydrogels were incubated in DMEM complete medium at a mass ratio of 1:10 (hydrogel:medium) at 37  °C for 24 h. The resulting extracts were filtered through a 0.22 μm sterile filter and used for subsequent cell culture experiments. Human umbilical cord mesenchymal stem cells (HUCMSCs) and HepaRG hepatocytes were digested with 0.05% trypsin and resuspended in DMEM. Cells were seeded into 96-well plates at a density of 5000 cells per well and cultured at 37  °C in a humidified incubator containing 5% CO2 for 24 h to allow cell adhesion. After removing the culture medium and washing with PBS, hydrogel extracts corresponding to each experimental group were added and incubated for 24 or 48 h. Following treatment, the medium was discarded, and cells were washed three times with PBS. Then, 100 μL of CCK-8 working solution (prepared by diluting CCK-8 with DMEM basal medium at a ratio of 1:10) was added to each well. After incubation at 37  °C in a 5% CO2 incubator for 30 min, the absorbance at 450 nm was measured using a microplate reader. Cell viability was calculated using the following formula:

Cell viability (%) = ×100%

**1.12.4 The live/dead fluorescence assay**

Human umbilical cord mesenchymal stem cells (HUCMSCs) and HepaRG hepatocytes were digested with 0.05% trypsin and resuspended in DMEM. Cells were seeded into 48-well plates at a density of 5000 cells per well and incubated at 37  °C in a humidified incubator with 5% CO2 for 24 h to allow cell adhesion. Afterward, the cells were washed three times with PBS and cultured with hydrogel extracts (GHH, GHHF, GHHC, and GHHFC) for 24, 72, and 120 h. At each time point, the culture medium was removed, and cells were washed three times with PBS. Then, a live/dead staining working solution (2 μM calcein AM and 8 μM propidium iodide [PI]) was added and incubated at room temperature for 20 min. After washing once with PBS, an anti-fade mounting medium was added, and fluorescence images were immediately captured using a fluorescence microscope to assess cell viability. Live cells stained with calcein AM exhibited green fluorescence, while dead cells stained with PI exhibited red fluorescence.

**1.12.5 Cytoskeleton Staining**

HUCMSCs were seeded onto sterilized glass coverslips placed in 24-well plates at an appropriate density and cultured with different hydrogel extracts (GHH, GHHF, GHHC, and GHHFC) for 72 h. After incubation, cells were gently washed three times with PBS and fixed with 4% paraformaldehyde for 15 min at room temperature. Subsequently, cells were permeabilized with 0.1% Triton X-100 for 10 min and washed again with PBS. To visualize the cytoskeleton, cells were incubated with phalloidin conjugated to a fluorescent dye (e.g., Alexa Fluor 488-phalloidin) at room temperature in the dark for 30 min to stain F-actin. After washing with PBS, the nuclei were counterstained with DAPI for 5 min. Following a final PBS rinse, the coverslips were mounted with an anti-fade mounting medium and observed under a fluorescence microscope to assess cell morphology and cytoskeletal organization.

**1.13 *In vitro* pro-vascularization**

First, thawed Matrigel was added to 48-well plates at a volume of 100 μL per well and incubated under culture conditions for 30 min to allow gelation from the liquid to solid state. Human umbilical vein endothelial cells (HUVECs) were dispersed using different hydrogel extracts (GHH, GHHF, GHHC, and GHHFC) and seeded onto the surface of the solidified Matrigel at a density of 1 × 105cells per well.After incubation at 37  °C for 6 h, the formation of tubular network structures was observed under a microscope. Parameters of the tube-like networks, including the number of nodes, meshes, and branches, were quantitatively analyzed using ImageJ software.

**1.14 *In vitro* stem cell differentiation induction**

To induce hepatic differentiation, third-generation HUCMSC cells were printed with bioink according to the above groups and then cultured in DMEM/F-12 medium containing 0.5 μmol/L dexamethasone, 10 ng/mL epidermal growth factor (Peprotech), 20 ng/mL HGF (hepatocyte growth factor; Peprotech), and 1% ITS (insulin-transferrin-selenium; Invitrogen) for 2 weeks. Afterward, the medium was replaced with DMEM/F-12 containing 0.5 μmol/L dexamethasone, 20 ng/mL HGF, 10 ng/mL Oncostatin M (Peprotech), and 1% ITS, and cultured for another 2 weeks.

**1.15 RT-qPCR Analysis of ALB, AFP, CK18, and GAPDH mRNA Expression in Hepatocyte-like Cells**

Cells obtained from the hepatic differentiation protocol described in section 1.14 were used for quantitative analysis of hepatic lineage markers by real-time reverse transcription quantitative PCR (RT-qPCR). When cell confluence reached approximately 80-90%, the cells were digested and collected as a suspension. A portion of the suspension was added to a hemocytometer to determine cell number. Based on a seeding density of 5 × 104 cells per well, the appropriate volume of the cell suspension was seeded into 6-well plates and incubated overnight at 37 ℃ in a humidified incubator with 5% CO2 to allow cell attachment. After overnight incubation, the medium was removed, and the cells were washed 1-2 times with PBS. Then, hydrogel extracts from the respective groups were added, and the plates were incubated at 37 ℃ with 5% CO2 for an additional 7 days. After 7 days of treatment, the plates were removed, and the cells were washed 1-2 times with PBS. Trizol reagent was added on ice to extract total RNA, following standard procedures including phase separation, precipitation, washing, dissolution, and concentration measurement. Subsequently, reverse transcription was performed using a reverse transcription reagent mix, prepared on ice, to synthesize cDNA. Specific primers for the target genes were designed, and the samples were mixed with PCR mix and primers, followed by amplification using a real-time PCR system according to the programmed cycling conditions. Finally, results were exported and analyzed.

**1.16 RT-qPCR Analysis of Liver-Specific Transcription Factors Hnf1α and Foxa2**

Cells obtained from the hepatic differentiation process described in section 1.14 were collected for the analysis of liver-specific transcription factors Hnf1α and Foxa2 using real-time RT-qPCR. The experimental procedure followed the same steps as described in section

**1.17 RT-qPCR Analysis of Hepatocyte Maturation-Related Genes Prkaca, Prkacb, and Prkx**

Cells obtained from the hepatic differentiation process described in section 1.14 were collected for the analysis of hepatocyte maturation-related genes Prkaca, Prkacb, and Prkx using real-time RT-qPCR. The experimental procedures were conducted following the same protocol as described in section

**1.18 Bioinformatics Analysis**

Differentially expressed genes (DEGs) were identified based on the criteria of Log₂ fold change ≥ 1 and P < 0.05. The DEGs were then imported into the Database for Annotation, Visualization and Integrated Discovery (DAVID, https://david.ncifcrf.gov/) for Gene Ontology (GO) enrichment analysis to identify enriched biological processes, molecular functions, or cellular components associated with the DEGs. KEGG (Kyoto Encyclopedia of Genes and Genomes) pathway enrichment analysis was also performed to determine the roles of DEGs in various biological pathways. This analysis provides comprehensive functional annotations of genes and gene products, and evaluates their involvement in pathways such as cellular signaling and metabolic processes. Subsequently, Gene Set Enrichment Analysis (GSEA) was conducted. Gene sets showing significant enrichment were downloaded from the GSEA database (https://www.gsea-msigdb.org/). GSEA analysis was performed using R software (version 4.2.1), and the results were visualized to identify key pathways associated with inflammatory responses and the NF-κB signaling pathway.

**1.19 Liver regeneration scaffold transplantation surgery**

All animal procedures were conducted in accordance with institutional guidelines and were approved by the Laboratory Animal Ethical and Welfare Committee of laboratory Animal Center, Ningxia Medical University (Approval No. IACUC- 2025280). All procedures followed the principles of the Declaration of Helsinki and complied with the ARRIVE guidelines. Male C57BL/6J mice aged 8-10 weeks were quarantined and housed for 7 days before the experiment. The mice were anesthetized with Tribromoethanol (20μL /10g, M5358，AbMole) and placed in a supine position on a surgical board. The abdominal area was shaved and disinfected with iodine tincture. Using sterile surgical instruments, the abdomen was opened to expose the mesentery, and a scaffold was implanted and fixed into the mesentery. The abdominal cavity was then sutured, and the surgical site was disinfected. After surgery, the mice were placed on a heated pad to recover gradually. Once awake, they were returned to their cages for continued housing.

**1.20 Liver resection surgery**

28 days after the mesenteric scaffold implantation surgery in mice, 3 mice from each group were randomly selected to collect blood samples for routine blood tests and liver function tests (8 parameters). 28 days after the mesenteric scaffold implantation surgery, the mice were anesthetized with Tribromoethanol (20μL /10g, M5358，AbMole).The abdominal area was shaved and disinfected with iodine tincture. Using sterile surgical instruments, the abdomen was opened to expose the liver, and the liver was covered with moist gauze to keep it hydrated. The vessels at the root of the left lateral lobe, middle lobe, and right anterior lobe were ligated, and the left lateral lobe, middle lobe, and right anterior lobe of the liver were resected. Hemostasis was achieved by pressure, leaving the right posterior lobe and caudate lobe intact, which constitutes a 90% partial hepatectomy. After confirming there was no blood leakage, the abdominal cavity was sutured, and the surgical site was disinfected. The mice were then placed on a heated pad to recover gradually. Once awake, they were returned to their cages for continued housing. Post-surgery, the survival condition of the mice was observed daily. The survival rate was recorded, and blood samples from surviving mice were collected for routine blood tests and liver function tests (8 parameters). The mesenteric scaffold was collected for subsequent pathological staining.

**1.21 Vascular imaging after scaffold implantation**

14 days after the mesenteric scaffold implantation surgery in mice, the mice were injected via the tail vein with 1% FITC-Dextran (2,000,000 Mw; Sigma). Fifteen minutes later, the mice were anesthetized, and the implanted scaffold was removed. Fluorescence images were captured under a fluorescence microscope using the FITC fluorescence channel.

**1.22 H&E staining and PAS staining**

14 days after the mesenteric scaffold implantation surgery, euthanasia was humanely performed via cervical dislocation without chemical agents. The implanted scaffold was then removed and fixed in 4% paraformaldehyde for 24 hours. After fixation, the scaffold underwent paraffin dehydration, embedding, sectioning, and staining with H&E and PAS, among other procedures.

**1.23 FAH and CD31 fluorescence staining**

At 14 and 28 days after the mesenteric scaffold implantation surgery, euthanasia was humanely performed via cervical dislocation without chemical agents. The implanted scaffold was then removed and fixed in 4% paraformaldehyde for 24 hours. Following fixation, the scaffold underwent paraffin dehydration, embedding, sectioning, and immunofluorescence staining. FAH was labeled in red, CD31 in green, and DAPI was used to stain the cell nuclei in blue. Fluorescence images were observed under a fluorescence microscope, and the expression of FAH and CD31 fluorescence was recorded.

**1.24 Statistical analysis**

All quantitative data are expressed as mean ± standard deviation (SD), with at least three independent replicates (n ≥ 3) for each group. Statistical analyses were performed using GraphPad Prism 9.0 e. Comparisons among multiple groups were evaluated by one-way or two-way ANOVA, followed by Tukey’s post-hoc test to determine pairwise significance. A value of *p* < 0.05 was considered statistically significant. Significance levels are indicated in the figures as *p < 0.05 (*), p < 0.01 (**), and p < 0.001 (***)*.


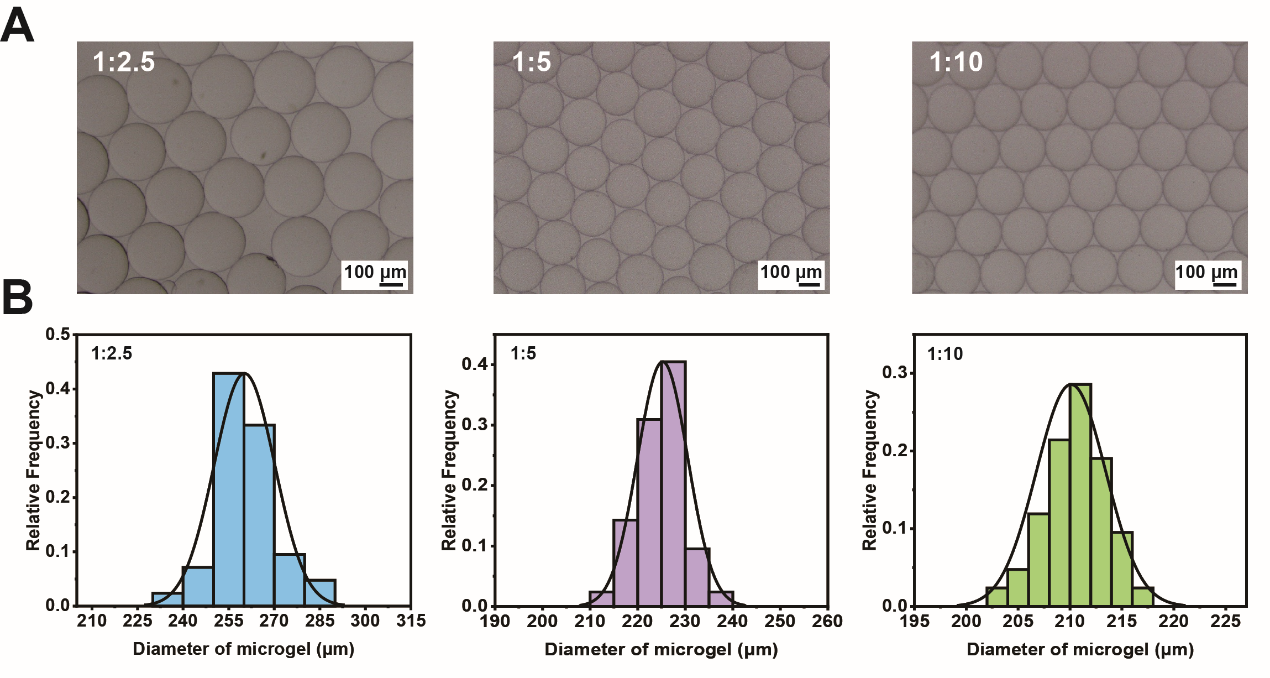


**Figure S1 Structural and compositional characterization of microspheres.** (A) Schematic diagram of the microsphere preparation device and chip; (B) SEM images of the microspheres; (C) Microscopic images of microspheres produced at different flow rate ratios; (D) Diameter distribution of microspheres produced at different flow rate ratios.


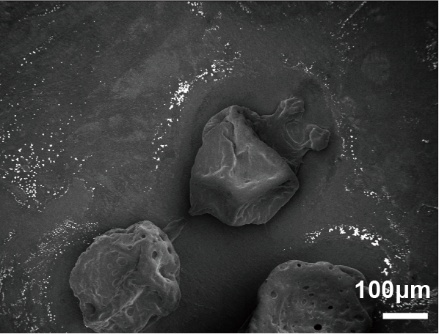


**Figure S2.** SEM image of the microspheres.


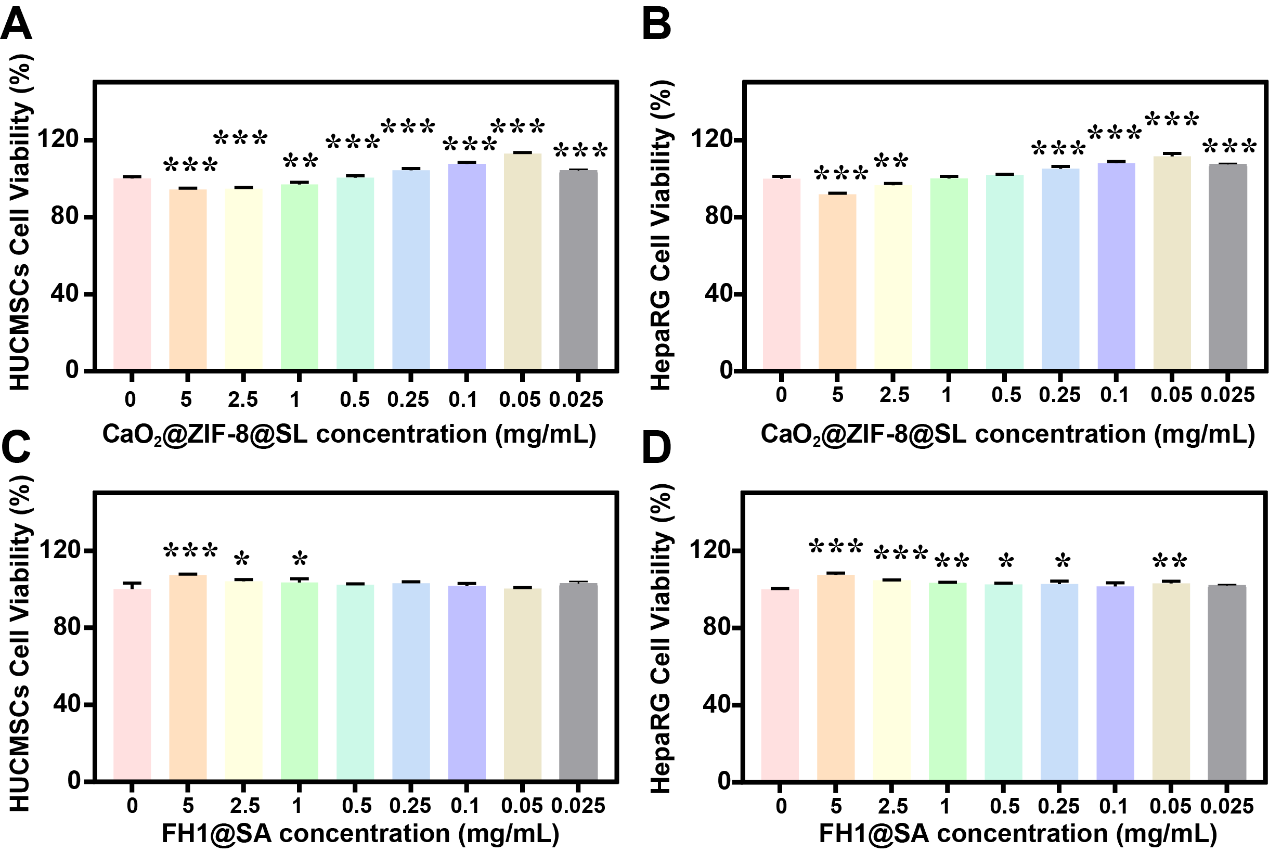


**Figure S3. Cytotoxicity.** (A) Cytotoxicity of CaO2@ZIF-8@SL on HUCMSC cells; (B) Cytotoxicity of CaO2@ZIF-8@SL on HepaRG cells; (C) Cytotoxicity of FHI@SA hydrogel microspheres on HUCMSC cells; (D) Cytotoxicity of FHI@SA hydrogel microspheres on HepaRG cells.

The CCK-8 method was used to systematically evaluate the effects of different concentrations of CaO2@ZIF-8@SL solution and FHI@SA hydrogel microspheres on the viability of HUCMSC and HepaRG cells (Figure 4). The results showed that CaO2@ZIF-8@SL exhibited a concentration-dependent effect on both cell types. In HUCMSC, cell viability reached its highest value (112.92%) at a drug concentration of 0.05 mg/mL, but significantly decreased to 94.37% at higher concentrations (5 mg/mL), while the lower concentration range (0.025–0.1 mg/mL) promoted cell proliferation (Figure 4A). A similar phenomenon was observed in HepaRG cells, where cell viability was highest (111.54%) at 0.05 mg/mL and decreased to 91.78% at 2.5 mg/mL, indicating that high doses had adverse effects on liver cells as well, while the lower concentration range (0.025–0.25 mg/mL) had a promoting effect (Figure 4B). However, overall cell viability was above 80%, indicating that CaO2@ZIF-8@SL nanoparticles had no cytotoxicity.

In contrast, FHI@SA hydrogel microspheres had a milder effect on cell viability. In both HUCMSC and HepaRG cells, when the concentration reached 0.5 mg/mL, the viability increased to 107.19% and 107.60%, respectively, while cell viability remained stable at other concentrations (Figure 4C, D). This suggests that FHI@SA hydrogel microspheres have good biocompatibility across a wide concentration range and do not cause significant toxic side effects.


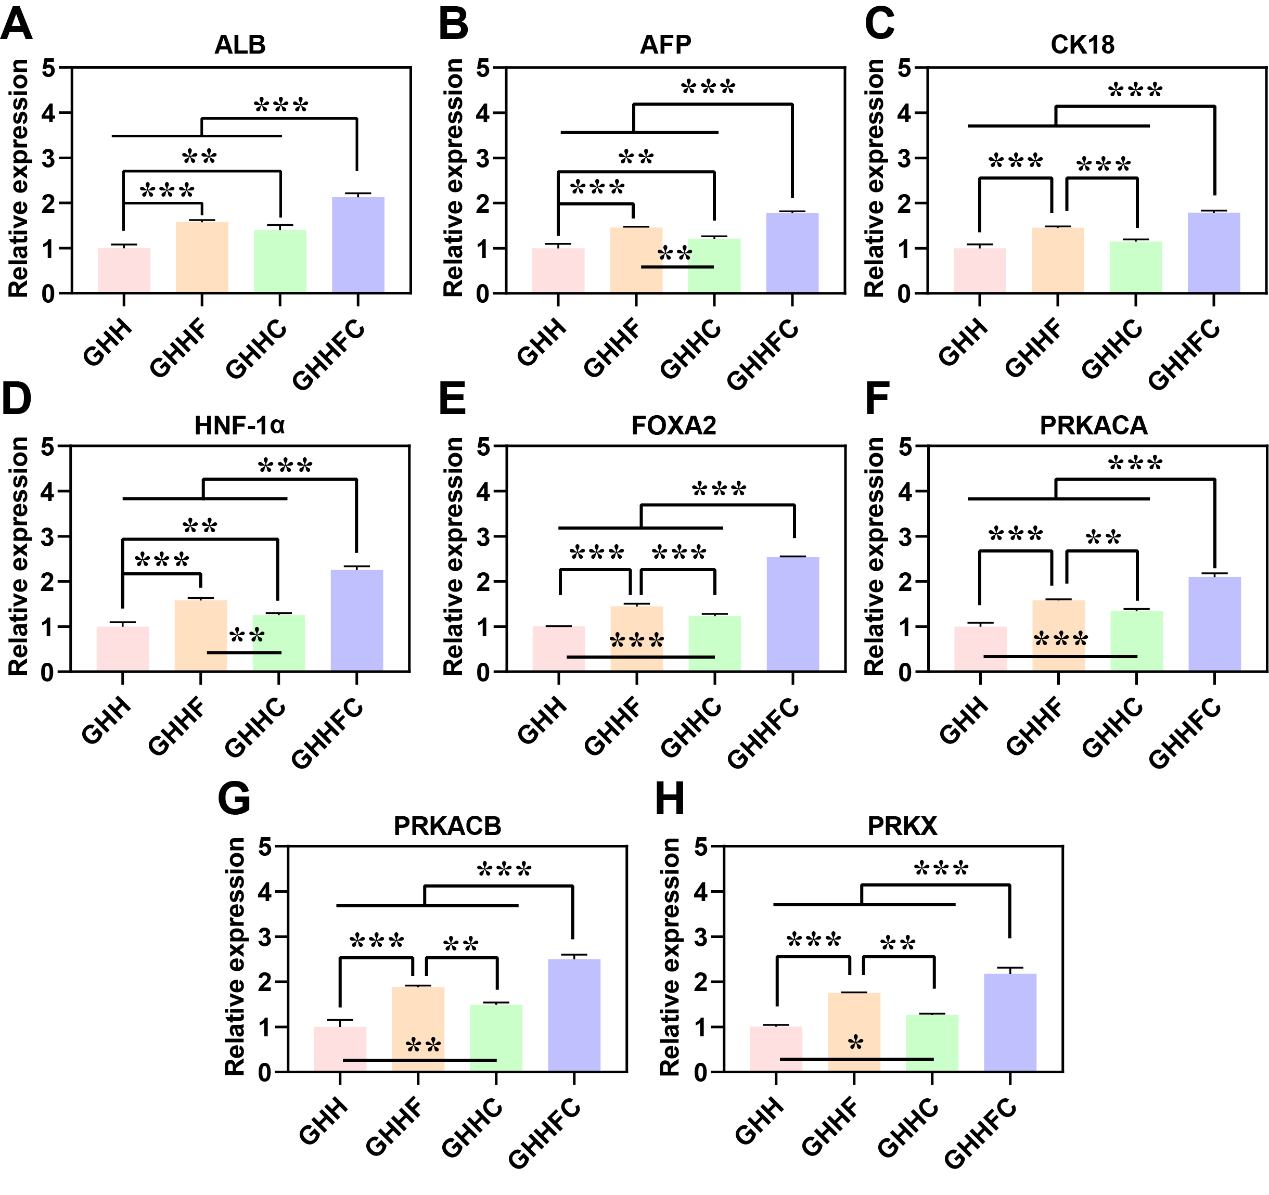


**Figure S4.** qPCR analysis of stem cell differentiation in vitro. (A-H) qPCR results of ALB, AFP, CK18, HNF-1α, FOXA2, PRKACA, PRKACB, and PRKX gene expression in HUCMCSCs differentiated within the 3D printed scaffold.


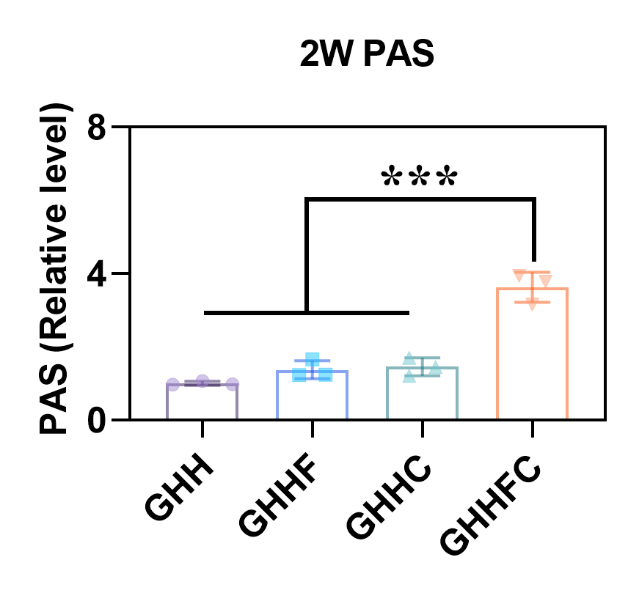


**Figure S5.** Quantitative statistical results of PAS immunofluorescence staining after 2 weeks of transplantation.


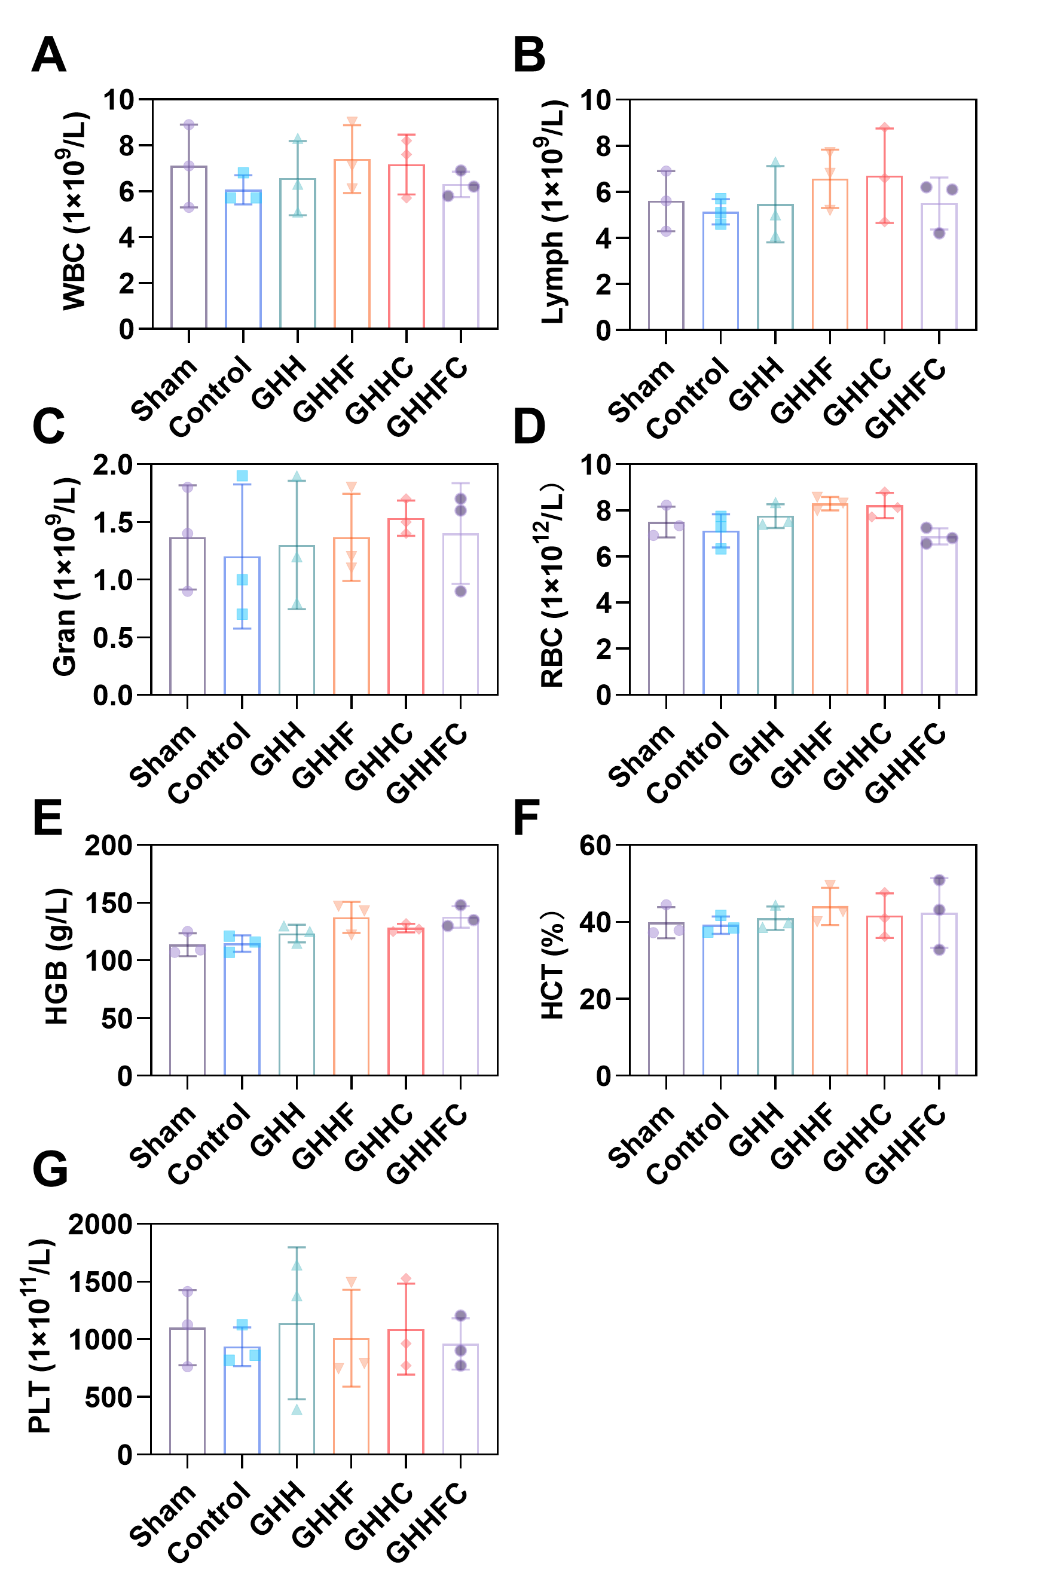


**Figure S6.** Pre-transplantation routine blood parameters of rats transplanted with different 3D-printed hydrogels. Hematological parameters measured before hydrogel transplantation for the Sham, Control, GHH, GHHF, GHHC, and GHHFC groups, including (A) White Blood Cell Count (WBC), (B) Lymphocyte Count (Lymph), (C) Granulocyte Count (Gran), (D) Red Blood Cell Count (RBC), (E) Hemoglobin (HGB), (F) Hematocrit (HCT), and (G) Platelet Count (PLT).


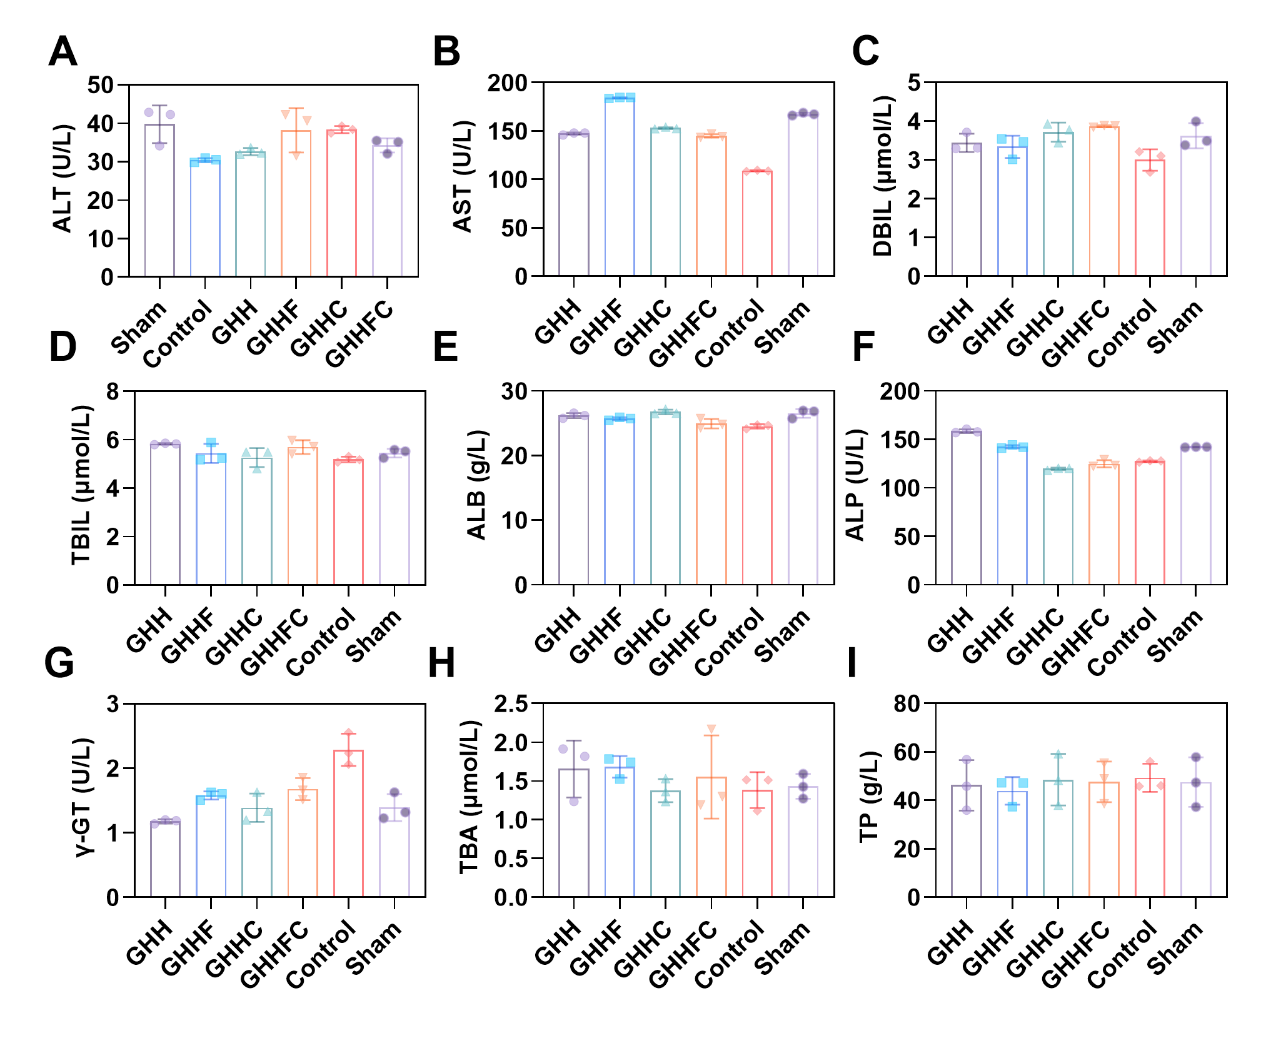


**Figure S7.** Preoperative serum biochemical indicators of rats transplanted with different 3D printed hydrogels. Before the hydrogel transplantation, serum levels of (A) ALT, (B) AST, (C) DBIL, (D) TBIL, (E) ALB, (F) ALP, (G) γ-GT, (H) TBA, and (I) TP were measured in the sham operation group, control group, GHH group, GHHF group, GHHC group, and GHHFC group. No significant differences were observed between groups, indicating comparable baseline liver function before surgery.


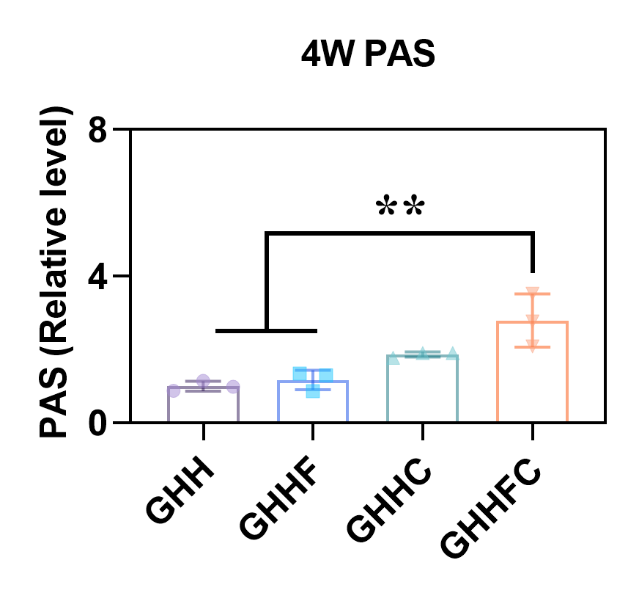


**Figure S8.** Quantitative analysis of PAS immunofluorescence staining 4 weeks after transplantation.


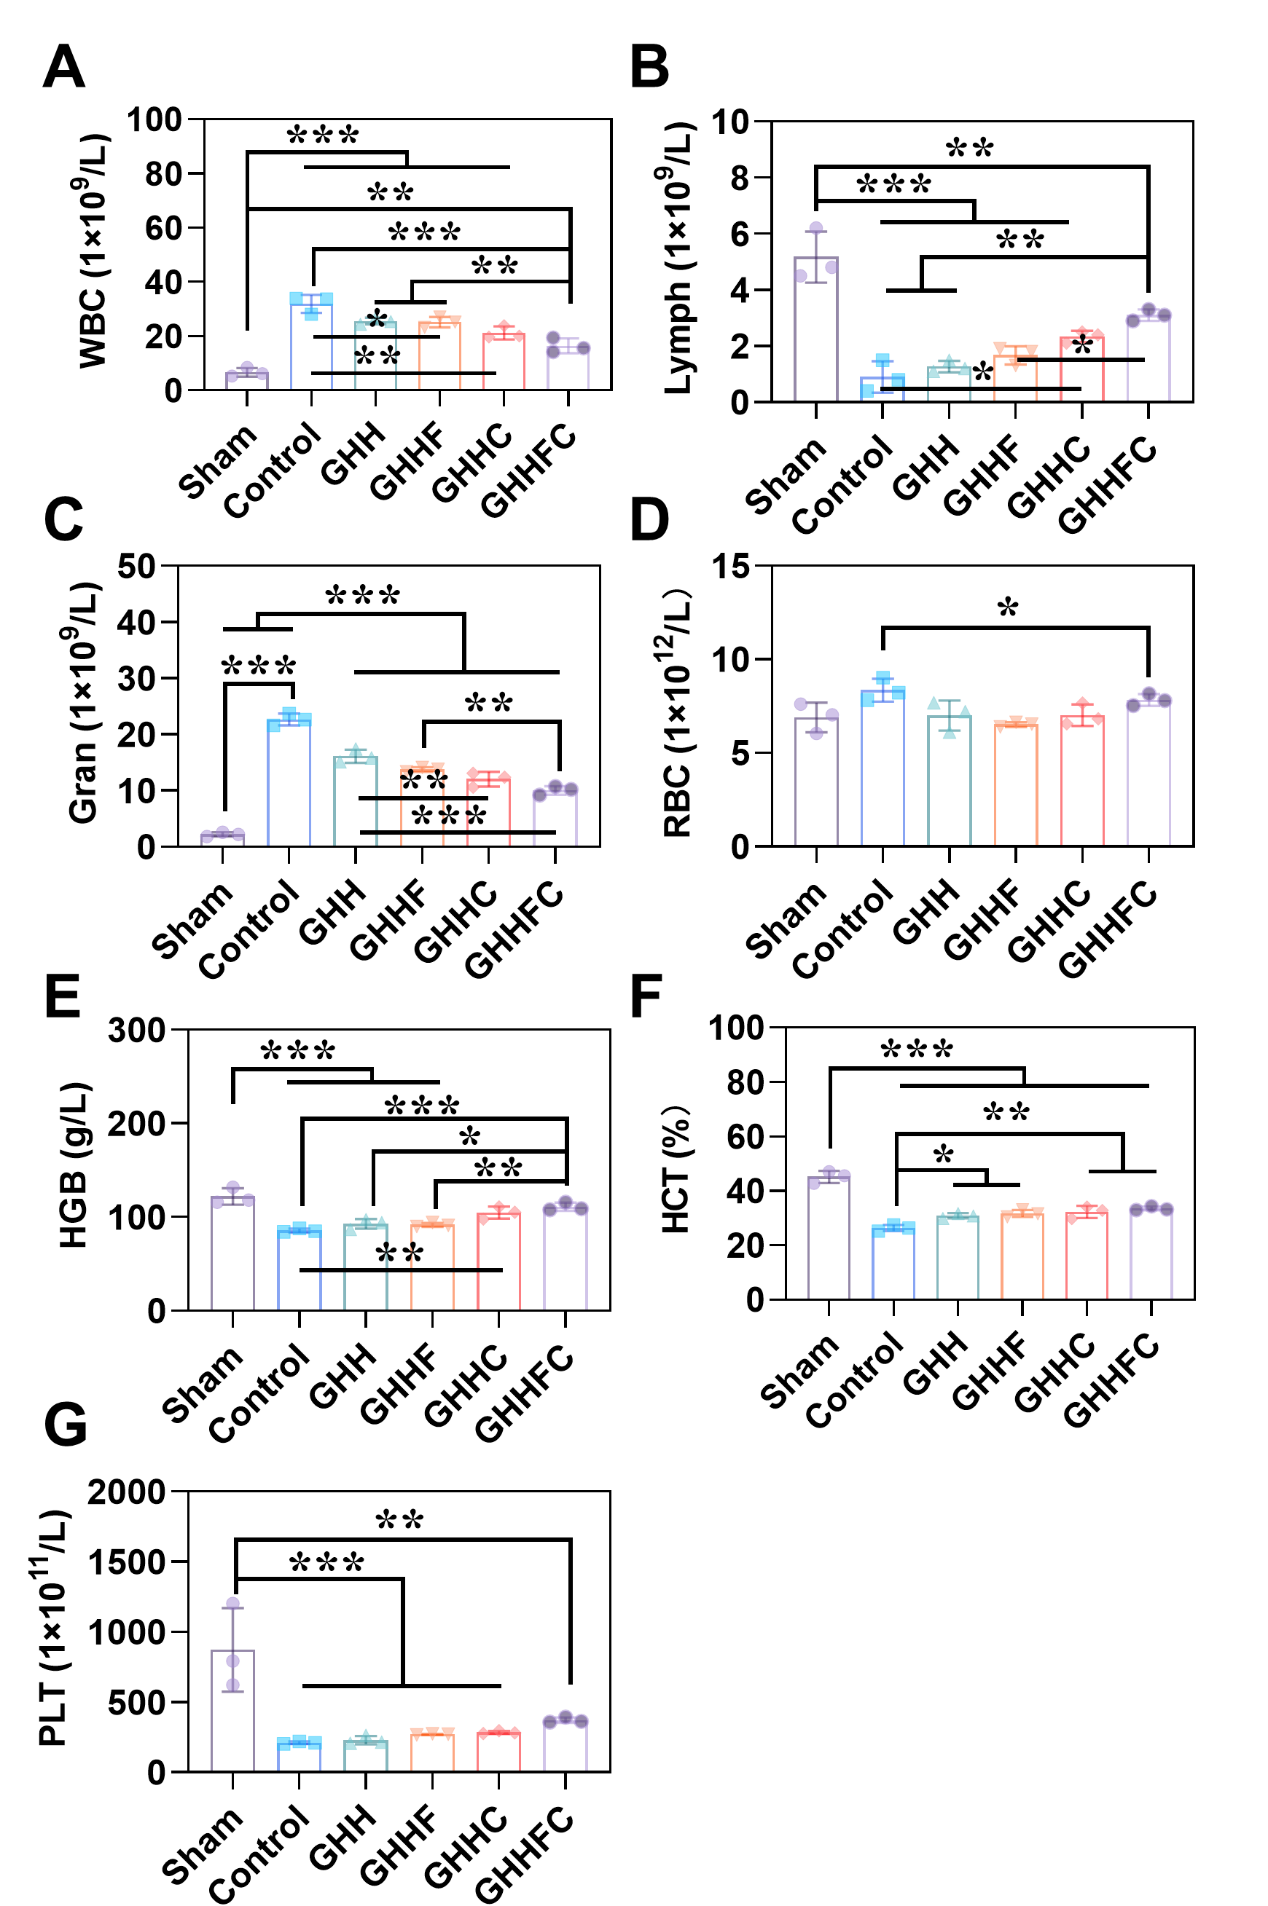


**Figure S9.** Hematological parameters of rats surviving after 90% hepatectomy. (A) White Blood Cells (WBC), (B) Lymphocytes (Lymph), (C) Granulocytes (Gran), (D) Red Blood Cells (RBC), (E) Hemoglobin (HGB), (F) Hematocrit (HCT), and (G) Platelets (PLT). Statistical differences are represented as *p < 0.05, **p < 0.01, and ***p < 0.001.
